1 **Genie: An interactive real-time simulation for teaching genetic drift**

2 Andreina I. Castillo <sup>1</sup>, Ben H. Roos <sup>2</sup>, Michael S. Rosenberg <sup>3</sup>, Reed A. Cartwright <sup>2,4\*</sup>, and

3 Melissa A. Wilson <sup>2,4,5\*</sup>

4

5 <sup>1</sup> Department of Environmental Science, Policy and Management. University of California,

6 Berkeley.

7 <sup>2</sup> The Biodesign Institute, Arizona State University.

8 <sup>3</sup> Center for the Study of Biological Complexity. Virginia Commonwealth University.

9 <sup>4</sup> School of Life Sciences. Arizona State University.

10 <sup>5</sup> Center for Evolution and Medicine. Arizona State University.

11

12

13

14

15

16

17

18 \* To whom correspondence may be addressed.

19 Email: [cartwright@asu.edu](mailto:cartwright@asu.edu) and [mwilsons@asu.edu](mailto:mwilsons@asu.edu)

20 **Abstract**

21 Neutral evolution is a fundamental concept in evolutionary biology but teaching this and  
22 other non-adaptive concepts is specially challenging. Here we present Genie, a browser-based  
23 educational tool that facilitates demonstration of concepts such as genetic drift, population  
24 isolation, gene flow, and genetic mutation. Because it does not need to be downloaded and  
25 installed, Genie can scale to large groups of students and is useful for both in-person and online  
26 instruction. Genie was used to teach genetic drift to Evolution students at Arizona State  
27 University during Spring 2016 and Spring 2017. The effectiveness of Genie to teach key genetic  
28 drift concepts and misconceptions was assessed with the Genetic Drift Inventory developed by  
29 Price et al. (2014). Overall, Genie performed comparably to that of traditional static methods  
30 across all evaluated classes. We have empirically demonstrated that Genie can be successfully  
31 integrated with traditional instruction to reduce misconceptions about genetic drift.

32

33

34

35

36

37

38

39

40 **Keywords:** Genetic Drift, Simulations, Evolution, Education.

## 41 **1. Introduction**

42 A well-recognized challenge in biological science education is successfully teaching  
43 evolutionary concepts (Alters and Nelson 2002). However, even within the same discipline,  
44 some topics remain more challenging to teach than others, and the number and efficacy of tools  
45 available for instruction varies (Shulman 1987; Ziadie and Andrews 2018). For instance,  
46 multiple strategies have been developed to improve the teaching of concepts like natural  
47 selection (Ziadie and Andrews 2018). On the other hand, best practices to teach equally  
48 important topics such as non-adaptive evolution remain largely understudied (Kalinowski et al.  
49 2013). This is particularly problematic for topics like genetic drift because concepts of adaptive  
50 and non-adaptive evolution form independent elements in evolutionary thinking, and better  
51 understanding of one does not necessarily implies better comprehension of the other (Beggrow  
52 and Nehm 2012). To address this, studies devoted to developing, improving, and testing teaching  
53 strategies for non-adaptive evolutionary concepts are needed.

54 Previous studies have created approaches aimed to identify student misconceptions  
55 regarding genetic drift (Andrews et al. 2012; Price et al. 2014), and study activities and software  
56 have been developed, tested, and made publicly available (Price et al. 2016; Revell 2019; Staub  
57 2002). These serve as indicators that the knowledge gap regarding genetic drift instruction is  
58 being addressed. Nonetheless, diverse class environments, student cohorts, and even teaching  
59 styles require distinct sets of tools; therefore, new tools are important for improving evolutionary  
60 instruction. Furthermore, there is an academic push for improving the teaching strategies  
61 currently set in place and to utilize alternative instruction methods (Lee et al. 2017; Nelson 2008;  
62 Tanner and Allen 2005). In particular, teaching strategies that favor discussion and testing of  
63 evolutionary concepts among student have been shown to be most effective (George M. Slavich

64 and Zimbardo 2012). As a result, tools that can be used to facilitate free in-class exploration of  
65 evolutionary concepts, are especially useful since they allow students to both learn these  
66 concepts and develop critical thinking skills.

67 Here, we developed a web application (Genie) designed to demonstrate several  
68 population genetics and evolutionary notions including genetic drift, gene flow, and random  
69 mutation. This application conducts a real time simulation of the change in allele frequencies in a  
70 finite population of spatially isolated individuals. Using colors, the application allows students to  
71 visualize changes in a population over time and understand how those visual changes translate to  
72 fluctuations in allele frequency, and eventually, fixation or loss of an allele. This web-based  
73 software is accessible to students and leads to increased knowledge of genetic drift concepts, as  
74 tested using a Genetic Drift Inventory (Price et al. 2014). These types of assessments have  
75 proven to be useful in capturing student's understanding of other complex evolutionary concepts  
76 in the past (Perez et al. 2013). The Genie software requires no startup other than navigating to a  
77 web page, thus making the use of programmed stochastic simulations to demonstrate the concept  
78 of genetic drift practical to both educators and students in face-to-face and online instruction.

79

## 80 **2. Methods**

### 81 *2.1 Genie simulation program*

82 Genie (<https://cartwrig.ht/apps/genie/>) is a web-based, stochastic simulation app written  
83 in JavaScript. The simulation uses a spatially explicit Moran Model (Nei et al. 1976) to describe  
84 a finite population of 1,024 individuals on a 32 by 32 grid. Individuals are haploid with a single

85 locus. The locus mutates according to the infinite alleles model (Nei et al. 1976). Genie works as  
86 follows:

- 87 • *Population Initialization.* The simulation begins when a population is randomly initialized  
88 according to Hoppe's Urn (Perez et al. 2013). Briefly, the population is created one  
89 individual at a time, and each individual either carries a new, unique allele or is a copy of a  
90 previously created individual. The probability that individual  $i + 1$  has a new allele is  $\theta/(\theta+i)$   
91 and the probability that the individual copies an existing allele is  $(i)/(\theta+i)$ , where  $\theta = 2N\mu$ ,  $N$   
92 is the population size, and  $\mu$  is the mutation rate. If an individual copies an allele, it randomly  
93 chooses a previously initialized individual uniformly. At initialization  $\mu$  is  $= 0.001$  to ensure  
94 diversity within the initial population, but the mutation rate of each generation can be  
95 specified by the user, defaulting to 0.
- 96 • *Algorithm.* At each step of the simulation, a randomly selected individual dies, leaving its  
97 corresponding cell momentarily empty. A parent allele is then randomly selected from the  
98 eight immediate neighboring cells (including adjacent and diagonal). Cells on the edges and  
99 corners of the simulation have fewer neighbors than internal cells, causing a small edge  
100 effect. The probability that a new individual will have the same allele as its parent is  $1-\mu$ ,  
101 and the probability that an individual has a new, unique allele is  $\mu$ . Each 'generation' consists  
102 of 2000 death/birth steps after which the population is redrawn in the visualization window.
- 103 • *Running.* The application contains four components: a grid, where the population is displayed  
104 (Supplementary file 1a); a control panel, where users can manipulate the simulation's  
105 mutation parameter (Supplementary file 1b); an upper graph, where users can see the number  
106 of alleles in the population at any given time (Supplementary file 1c); and a lower graph,  
107 where users can see the frequency of different alleles at any given time (Supplementary file

108 1d). Both graphs update in real time as the simulation runs. Each initial allele is assigned one  
109 of 18 basic colors, while each mutant allele is assigned one of six neon colors. A single  
110 button allows users to toggle between starting the simulation or pausing it. A reset button  
111 allows users to restart and reinitialize the simulation at any point.

112 • *Barriers*. Users can create a barrier in the population grid. To do so, users alter a cell (by  
113 clicking on it) or alter a set of cells (by clicking and dragging the cursor to select multiple  
114 cells). When a barrier is created, the color associated with the cell changes to black. Barriers  
115 act neither as parent cells (they are never replicated) nor die. Thus, for each created barrier  
116 cell the total population size declines by one. By building barriers, users can construct  
117 physical constraints that restrict the movement of alleles between subpopulations. Barriers  
118 can be used to create subpopulations of different sizes and shapes, as well as to study the  
119 effects of corridors on gene flow. Barriers can be removed by clicking on the chosen cell(s) a  
120 second time; this will set the cell color to white and designate the cell as unoccupied.  
121 Neighboring cells will replicate into unoccupied cells; unoccupied cells cannot serve as a  
122 parent of a neighboring cell.

123 • *Forced Mutation*. Users can force a mutation to occur in a manner similar to creating  
124 barriers. Cells can be mutated by holding the SHIFT button while clicking the cell, or while  
125 clicking and dragging the cursor across several cells. Forcing a mutation immediately creates  
126 a new, unique allele in each of the chosen cell(s).

127

## 128 2.2. Data collection

129 Genie's efficacy as a tool for teaching Genetic Drift concepts was tested in the Evolution  
130 (BIO345) class at Arizona State University (ASU). Genie was used during the practical portion

131 (recitation) of the BIO345 course in the Spring 2016 and Spring 2017 classes. All participants in  
132 the Spring 2016 class used Genie during practical class sessions. In the Spring 2017 class, half of  
133 the participants used the dynamic visualization of Genie while the other half used static  
134 illustrations. Participants in both the Spring 2016 and Spring 2017 classes were given the option  
135 to opt-in to the study at the end of the semester. In addition, participants were given the option to  
136 provide their demographic information: reported gender, reported ethnicity, and first-generation  
137 college student status. All research was reviewed and approved by Arizona State University's  
138 IRB protocol STUDY00003707.

139         The impact of Genie as a tool for teaching concepts of genetic drift was evaluated using  
140 the Genetic Drift Inventory (Price et al. 2014). The inventory was used without changes (22  
141 questions assessing different aspects of genetic drift) in pre- and post-recitation assessments. The  
142 pre- and post-recitation assessments (considered as homework for the entire class) were  
143 individually answered by each participant. The pre-recitation assessment was posted online on  
144 Blackboard two days before recitation. Participants were asked to answer all questions by 3:00  
145 pm of the day of the recitation. The post-recitation assessment was posted on Blackboard at 9:00  
146 pm after the last recitation session ended. Participants had two days to individually complete the  
147 post-recitation assessment. All participants were allowed the same amount of time to complete  
148 both the pre- and post-recitation assessments. Participant's answers were recorded, and their  
149 individual pre- and post-recitation scores were calculated by summing the number of correctly  
150 answered questions (value 1 point) out of the 22 questions in the Genetic Drift Inventory.

### 151 *2.3. Genie assessment*

152         The complete dataset was divided into two major groups based on instruction year. These  
153 groups were: the entire Spring 2016 class (henceforth referred to as Genie 2016) and the entire

154 Spring 2017 class. The 2017 class was further subdivided into groups based on the instruction  
155 method used during the practical class session. These groups were: participants that used Genie  
156 during the recitation session in 2017 (henceforth referred to as Genie 2017) and the participants  
157 who did not use Genie during the recitation session in 2017 (henceforth referred to as Non-Genie  
158 2017). The Genie 2016 class was subsequently divided into eight in-class groups of roughly  
159 equal size, while each 2017 class was divided into four in-class groups of roughly equal size  
160 (two Genie and two Non-Genie). The groups were designated based on recitation start times,  
161 Graduate Teaching Assistants (TA) pairs; and in the case of 2017, on the use of dynamic (Genie)  
162 vs. static (Non-Genie) instruction methods. No more than 48 participants participated in each  
163 recitation session. All analyses and figures were developed using R v3.2. The code and datasets  
164 used are available (Supplementary files 2-12,  
165 [https://github.com/AndreinaCastillo/Genie\\_manuscript\\_data\\_analysis](https://github.com/AndreinaCastillo/Genie_manuscript_data_analysis)).

166 The putative relationship between participants' demographics and the pre- and post-  
167 recitation scores was evaluated using a two-way ANOVA. The following demographic  
168 parameters were used as explanatory variables: reported gender, reported ethnicity, and first-  
169 generation college student status. In the case of 2017, the use of Genie as an instruction tool was  
170 also considered as an explanatory variable. The two-way ANOVA was performed independently  
171 for Genie 2016, Genie 2017, and Non-Genie 2017. Next, we assessed if the pre- and post-  
172 recitation performance varied between the three class groups or among subgroups within each  
173 class. To conduct this analysis, the distribution of pre- and post- recitation scores was assessed  
174 using the 'fitdistrplus' (Delignette-Muller and Dutang 2015) and 'betareg' (Cribari-Neto and  
175 Zeileis 2010) R packages. Potential differences between pre- and post-recitation scores were  
176 evaluated both between classes and within each in-class group. In addition, a Cohen's d was used



177 to measure the effect size between pre- and post-recitation scores within each class, and to  
178 estimate differences in pre- and post- recitation scores between Genie 2017 and Non-Genie 2017.

179 In addition, potential differences in groups of participants based on their initial  
180 performance levels following instruction were assessed. Participant's scores within Genie 2016,  
181 Genie 2017, and Non-Genie 2017 were divided into four quantiles based on their pre-recitation  
182 scores. The first quantile included participants with scores ranging from 0 to 0.25, the second  
183 quantile included participants with scores between 0.26-0.5, the third quantile included  
184 participants with scores of 0.51-0.75, and the fourth quantile included participants with scores of  
185 0.76-1. For each quantile within each class, a paired Student's t-test was performed in order to  
186 evaluate if participants with different performance levels (i.e. within each quantile) benefited  
187 differently from the use of Genie. Furthermore, a paired Student's t-test was performed between  
188 individual participants' pre- and post-recitation scores within each class.

189 Finally, question-specific performance was evaluated to determine how Genie aided  
190 participants in addressing the specific genetic drift concepts and misconceptions listed in the  
191 Genetic Drift Inventory (Price et al. 2014). The number of correct answers in pre- and post-  
192 recitation sessions associated with each question were calculated from participants' individual  
193 answers, and the totals were then compiled by class. Differences between pre- and post-  
194 recitation scores for each question were assessed using a McNemars  $\chi^2$  test. In addition, the  
195 difference in the number of correct answers per question in Genie 2017 vs. Non-Genie pre- and  
196 post-recitation sessions was assessed using a Fisher's exact test.

197

198

### 199 3. Results

200 Demographic representation varied among cohorts (Table 1). Participants identifying as  
201 People of Color ('POC') (N = 168) were less represented compared to participants identifying as  
202 'White' (N = 238) in Genie 2016. Both groups were roughly equal in Genie 2017 ('POC' = 136  
203 and 'White' = 144) and Non-Genie 2017 ('POC' = 120 and 'White' = 112). On the other hand,  
204 participants identifying as 'Female' (N = 230 in Genie 2016, N = 190 in Genie 2017, and N =  
205 140 in Non-Genie 2017) were more numerous than participants identifying as 'Male' (N = 176 in  
206 Genie 2016, N = 90 in Genie 2017, and N = 92 in Non-Genie 2017). Likewise, 'First-generation'  
207 college students were less numerous (N = 126 in Genie 2016, N = 46 in Genie 2017, and N = 36  
208 in Non-Genie 2017) than 'Not First-generation' college students (N = 280 in Genie 2016, N =  
209 234 in Genie 2017, and N = 196 in Non-Genie 2017). Regardless of these differences, pre- and  
210 post-recitation performance levels were similar in participants from different demographic  
211 backgrounds across the three evaluated class groups (Figure 1).

212 A two-way ANOVA found that most demographic explanatory variables did not affect  
213 pre- and post-recitation scores (Table 2). For instance, the variable 'Reported gender' did not  
214 have a clear effect on pre- or post-recitation scores in either year (Genie 2016 pre-recitation  $F =$   
215  $1.004$ ,  $p\text{-value} = 0.318$ ; Genie 2016 post-recitation  $F = 2.388$ ,  $p\text{-value} = 0.124$ ; 2017 pre-  
216 recitation  $F = 0.037$ ,  $p\text{-value} = 0.848$ ; 2017 post-recitation  $F = 0.010$ ,  $p\text{-value} = 0.921$ ).  
217 Likewise, the variable 'Reported ethnicity' did not have a clear effect in pre- ( $F = 1.046$ ,  $p\text{-value}$   
218  $= 0.397$ ) or post-recitation scores ( $F = 0.372$ ,  $p\text{-value} = 0.896$ ) in Genie 2016, or the post-  
219 recitation scores ( $F = 0.895$ ,  $p\text{-value} = 0.511$ ) in 2017. However, it did have a significant effect  
220 ( $F = 2.286$ ,  $p\text{-value} = 0.029$ ) in pre-recitation scores in 2017.

221 The variable ‘First-generation’ college had a statistical effect in pre- ( $F = 4.142$ ,  $p$ -value  
222  $= 0.043$ ) and post-recitation scores ( $F = 7.955$ ,  $p$ -value  $= 0.005$ ) in Genie 2016, but not in 2017  
223 (pre- recitation  $F = 0.466$ ,  $p$ -value  $= 0.496$ ; post- recitation  $F = 0.260$ ,  $p$ -value  $= 0.610$ ). ‘First-  
224 generation’ college students had lower pre-recitations scores than ‘Not First-generation’ students  
225 in Genie 2016 and Genie 2017, while the opposite trend was observed in Non-Genie 2017  
226 (Figure 1). While post-recitation scores were higher than pre-recitation scores in both groups,  
227 ‘First-generation’ college students showed slightly less improvement than ‘Not First-generation’  
228 college students. For instance, ‘First-generation’ college students saw an increase of 0.09  
229 compared to 0.13 for ‘Not First-generation’ college students in Genie 2016. The same trend was  
230 observed in Non-Genie 2017 (0.13 vs. 0.18 for ‘First-generation’ college students and ‘Not First-  
231 generation’ college students, respectively) and Genie 2017 (0.13 vs. 0.14 for ‘First-generation’  
232 college students and ‘Not First-generation’ college students, respectively). It should be noted that  
233 the number of ‘First-generation’ college students was higher in Genie 2016 ( $N = 126$ ) as well as  
234 Genie 2017 ( $N = 46$ ), compared to Non-Genie 2017 ( $N = 36$ ). The ‘Genie used’ variable showed  
235 a significant effect ( $F = 6.131$ ,  $p$ -value  $= 0.014$ ) in pre-recitation scores in 2017 but not in post-  
236 recitation scores ( $F = 2.350$ ,  $p$ -value  $= 0.127$ ). The difference between mean pre-recitation scores  
237 between the Genie and Non-Genie 2017 classes was small (0.0495, or approximately 1 out of 22  
238 questions), with Genie 2017 having a higher mean pre-recitation score (0.7808) than Non-Genie  
239 2017 (0.7313). The difference in post-recitation scores was 0.0368, with Genie 2017 still having  
240 a higher mean (0.8828) than Non-Genie 2017 (0.8460).

241 Overall, pre- and post-recitation scores were different among the classes analyzed. The  
242 mean pre-recitation score for Genie 2016 (0.6444) was lower than in either Genie 2017 or Non-  
243 Genie 2017 (see above). This same trend was maintained for post-recitation scores in Genie 2016

244 (0.7481) compared to Genie 2017 or Non-Genie 2017 (see above). Differences in post-recitation  
245 scores could be largely explained by the initial differences in pre-recitations scores, or in other  
246 words, the initial class performance (Table 3). Furthermore, in-class groups showed similar  
247 performance levels among Genie 2016, Genie 2017, and Non-Genie 2017. An outlier to this  
248 observation was the ‘TA Pair1 7:30pm’ in-class group (p-value=0.017) during Genie 2016,  
249 which was composed exclusively of honor students. Overall, the density curve of post-recitation  
250 scores showed that participant performance improved in all classes regardless of the instruction  
251 method used (Figure 2). Furthermore, Cohen’s d values (Table 4) showed a moderate  
252 improvement in post-recitation scores compared to the pre-recitation scores in Genie 2016  
253 (0.608, CI: 0.408-0.807), Genie 2017 (0.632, CI: 0.410-0.855), and Non-Genie 2017 (0.658, CI:  
254 0.430-0.886). In addition, Cohen’s d values also showed a small difference in pre- (0.272, CI:  
255 0.051-0.493) and post-recitation (0.242, CI: 0.021-0.462) scores between Genie 2017 and Non-  
256 Genie 2017.

257         Post-recitation scores were higher than pre-recitation scores for most individual  
258 participants within all classes (Table 5, Supplementary file 13). Furthermore, participants across  
259 three out of four quantiles of initial pre-recitation scores showed improvement in their post-  
260 recitation scores (Table 6). There were too few participants (1-2 individuals across all groups)  
261 with pre-recitation scores between 0-0.25 (the lowest quantile), making unfeasible to statistically  
262 evaluate this group. In Genie 2016, the highest improvement was observed in participants with  
263 pre-recitation scores between 0.26-50 ( $T = -7.855$ ,  $p\text{-value} = 4.294 \times 10^{-11}$ ). In Genie 2017 ( $T = -$   
264  $7.118$ ,  $p\text{-value} = 1.191 \times 10^{-09}$ ) and Non-Genie 2017 ( $T = -7.714$ ,  $p\text{-value} = 4.412 \times 10^{-11}$ ), the  
265 highest improvement was seen in participants with pre-recitation scores between 0.51-0.75.

266 Participants from the top quantile (pre-recitation scores between 0.76-1), had the smallest  
267 improvement in their post-recitation scores, particularly in Non-Genie 2017 (Table 6).

268 Participants understanding of key genetic drift concepts and misconceptions statistically  
269 improved after instruction with or without Genie (Table 7, Figure 3). Post-recitation scores were  
270 generally higher in Genie 2017 than in Non-Genie 2017 except for two questions (Q10 and Q15,  
271 Figure 4). When the difference between pre- and post-recitation scores by question was plotted  
272 (Figure 5), there was variation in which questions had a higher score improvement in Non-Genie  
273 2017 or Genie 2017. Non-Genie 2017 showed higher improvements in questions related to key  
274 concepts (Q1, Q10, and Q13) and misconceptions associated to genetic drift as natural  
275 selection/adaptation/acclimation to the environment that may result from a need to survive (M2),  
276 genetic drift as random mutation (Q9), and genetic drift as gene flow or migration (Q11). On the  
277 other hand, Genie 2017 showed higher improvements in misconceptions related to natural  
278 selection being always the most powerful mechanism of evolution, and as the primary agent of  
279 evolutionary change (M4). However, a Fisher's exact test showed that instruction method (Genie  
280 vs. Non-Genie) was not associated with student's switching answers from correct to incorrect or  
281 incorrect to correct between pre- and post-recitation (Table 8). Results were comparable with or  
282 without including students within honor sections (Supplementary file 14).

283

#### 284 **4. Discussion**

285 There are numerous other software capable of generating genetic drift simulations. Some  
286 of them can be easily downloaded and installed (Kliman et al. 2008; Revell 2019), others include  
287 an ample array of parameters to be modified by the user

288 (<http://evolution.gs.washington.edu/popgen/popg.html>), and others can be found publicly  
289 available online (e.g. the Genetic Drift Simulator  
290 (<http://www.biology.arizona.edu/evolution/act/drift/drift.html> or Phyletica  
291 (<http://phyletica.org/teaching/drift-simulator/>). Some of this software even have a dynamic  
292 interface similar to that developed by Genie  
293 ([http://virtualbiologylab.org/NetWebHTML\\_FilesJan2016/RandomEffectsModel.html](http://virtualbiologylab.org/NetWebHTML_FilesJan2016/RandomEffectsModel.html)). One  
294 notable software (Avida-ED) has a dynamic presentation and accessibility ([https://avida-](https://avida-ed.msu.edu/app/AvidaED.html)  
295 [ed.msu.edu/app/AvidaED.html](https://avida-ed.msu.edu/app/AvidaED.html)) alike Genie, but has additional parameters that permit for the  
296 evaluation of complex evolutionary hypotheses. While this list is not exhaustive, it provides a  
297 glimpse on how computational tools, and especially those found freely in web-interfaces, are  
298 becoming predominantly used in science teaching. The objective of this paper is not to compare  
299 Genie's performance to all these tools, instead, the authors aim to present an additional teaching  
300 tool that can be added to an instructor's repertoire. As such, we endeavor to show that Genie can  
301 be efficiently used alongside teacher-centered class instruction. A comparison was made between  
302 Genie-based instruction and instruction using static images (henceforth referred as teacher-  
303 centered instruction). The comparison was chosen since teacher-centered methods still are  
304 commonly used in science teaching (Tanner and Allen 2004) and have been traditionally used  
305 when teaching evolutionary topics in ASU.

306         There were no significant differences in the performance levels among participants from  
307 distinct demographic backgrounds. Despite differences in levels of representation across groups  
308 (e.g. more 'Female' than 'Male' participants in both Genie 2016 and 2017), pre- and post-  
309 recitation scores were similar. This suggests that Genie was as an effective teaching tool  
310 regardless of participant's demographics. However, it should be mentioned that the variable

311 ‘First-generation’ college students had statistical effect on participant’s performance. While  
312 participant’s performance increased in all methods of instruction, ‘First-generation’ college  
313 students showed slightly lower improvement than ‘Non-first generation’ college students.  
314 Multiple studies have attempted to address the social class gap among undergraduate students  
315 and explain why ‘First-generation’ college students, in occasion, perform more poorly than  
316 ‘Non-first generation’ college students (Grineski et al. 2018; Tibbetts et al. 2018). One finding  
317 pertinent to our assessment is that ‘First-generation’ college students tend to underperform when  
318 they know that their performance is going to be compared to that of other students in the class  
319 (Jury et al. 2015). This might be an unintended consequence of the in-class methods used here,  
320 which favored in-class discussion and student participation. However, while not possible to  
321 address here, is possible that these results point towards the unique disadvantages and social-  
322 related pressures that ‘First-generation’ college students face within ASU. These results should  
323 be evaluated in more detail in future studies.

324 We were unable to control for previous classes that BIO345 students took. Although, all  
325 students in BIO345 are required to have passed BIO340 (General Genetics), which typically  
326 includes instruction in evolutionary genetics; BIO340 is taught by multiple instructors, who do  
327 not teach evolutionary genetics equally. However, participants’ performance in all classes  
328 increased following instruction. Interestingly, mean scores showed that the increase in  
329 performance between pre- and post-recitation was ~0.1 regardless of the teaching method used.  
330 The main distinction were the pre-recitation scores, with some classes initially performing better  
331 than others. Taken together, these results are indicative that both teacher-centered and Genie-  
332 based teaching strategies led to a comparable improvement in participant’s scores, regardless of  
333 the initial performance level of the class. Thus, it is possible to conclude that Genie can perform

334 as efficiently as traditionally teacher-centered instruction. In addition, when participant groups  
335 were divided based on the initial performance within their class (pre-recitation performance  
336 quantiles) both instruction methods lead to an increase in post-recitation scores. However, some  
337 quantiles saw more improvement than others. The highest improvement was observed in  
338 participants from the second pre-recitation score quantile in Genie 2016 and the third pre-  
339 recitation score quantile in 2017. On the other hand, participants with the highest pre-recitation  
340 scores (fourth quantile), showed the smallest improvement. The latter trend was more evident  
341 between Genie 2017 and Non-Genie 2017, with fourth quantile participants taking Genie-based  
342 classes having a slightly larger improvement than participants taking teacher-centered classes.  
343 This suggest that participants with initial lower understanding of the material similarly benefited  
344 from instruction with Genie as with other methods, while participants with initial higher  
345 understanding of the material benefited a little more when Genie was used.

346 In addition, participants' performance was not affected by the instructor or the participant  
347 populations within the group, except for the 'TA Pair1 7:30pm' group during Genie 2016. The  
348 'TA Pair1 7:30pm' group was formed by a small number of honors students; therefore, it is  
349 possible that this group simply performed better compared to the general class population in  
350 Genie 2016. Previous studies have found that instructors' mastery of the content, as well as their  
351 overall teaching style play a critical role in students' learning process (Alsharif and Qi 2014;  
352 Maleki et al. 2017). Thus, our results are indicative that Genie performs similarly well even with  
353 teachers using diverse teaching styles and having variable levels of expertise.

354 Overall, understanding of genetic drift key concepts and misconceptions improved  
355 following instruction with all teaching strategies. Nonetheless, it should be noted that there were  
356 small variations in how well participant's performed in individual questions when using



357 teaching-centered vs. Genie-based methods. Within 2017, teaching-centered methods performed  
358 better in questions related to key concepts on genetic drift as well as in understanding the  
359 difference between genetic drift and other non-adaptive or adaptive evolutionary mechanisms.  
360 On the other hand, Genie-based teaching aid the participants' understanding on the importance of  
361 genetic drift as a source for evolutionary change and its relationship with natural selection. These  
362 results suggest that a combined teaching strategy using Genie alongside with traditional teacher-  
363 centered methods might help participants in gaining a more rounded comprehension of genetic  
364 drift concepts. In agreement with this conclusion, previous analyses have shown that a  
365 combination of traditional teaching-centered methods, with student-centered methods, and active  
366 learning strategies results in superior student performance (Dolan and Collins 2015; Shir et al.  
367 2016; Wieman 2014).

368 In the case of evolution teaching, strategies that favor student's development of critical  
369 thinking skills are especially useful. For instance, tools and methods that aid in creating and  
370 testing hypotheses have been effective in improving student's understanding and acceptance of  
371 evolutionary theory (Lark et al. 2018; Smith et al. 2016). Likewise, instruction using computer  
372 simulation programs has proven to be valuable in facilitating student's recognition of the breadth  
373 of evolutionary mechanisms that can act in a population (Kliman 2001). In that regard, flexible  
374 software that can be used to illustrate how diverse evolutionary forces are intrinsically linked can  
375 be particularly useful in teaching. For example, the award-winning software Avida-ED, has been  
376 effectively used to introduce evolutionary ideas to freshmen students via hypothesis testing (Abi  
377 Abdallah et al. 2020), understand the role of low-impact mutations in evolution (Nelson and  
378 Sanford 2011), and to test the robustness of genetic drift in small populations (Labar and Adami  
379 2017). Nonetheless, it should not be forgotten than different students can master the same topic

380 using different paths (Price et al. 2016), and that different classroom settings might be more  
381 suitable for distinct teaching methods. Simply put, there is no ‘fit all’ teaching strategy that can  
382 be universally implemented. Therefore, providing instructors with broad repertoire of teaching  
383 tools can aid them in finding those that better work for the topic being instructed, the specific  
384 class needs, and the instructor style. In this regard, we expect Genie can be added to the  
385 repertoire of higher education tools to be used for teaching genetic drift and other non-adaptive  
386 evolution concepts.

387

## 388 **5. Conclusion**

389 The present study shows that Genie can be successfully used for teaching undergraduate  
390 students concepts related with genetic drift and non-adaptive evolution. Genie performed  
391 comparably to traditional teacher-centered methods across all evaluated groups. Moreover,  
392 Genie-based and teacher-centered approaches led to participants understanding distinct key  
393 concepts and misconceptions of genetic drift. This indicates that Genie can be effectively used  
394 alongside other teaching strategies to provide a rounded view of non-adaptive evolution. In a  
395 related note, Genie provides a mean for participants to develop and test their own hypotheses,  
396 which can be useful in practicing critical thinking skills.

397

398 **Tables**

399 **Table 1. Demographic breakdowns of participants in each year and section shows variable**

400 **representation of different groups.** The breakdown of participants in each year of the class

401 who participated in the assessment, including those who self-identified as people of color

402 ('POC') or 'white', 'female' or 'male', and 'first-generation' college students or not.

| Categories                   | Genie 2016 | Genie 2017 | Non-Genie 2017 |     |
|------------------------------|------------|------------|----------------|-----|
| POC                          | 168        | 136        | 120            |     |
| White                        | 238        | 144        | 112            |     |
| Female                       | 230        | 190        | 140            | 404 |
| Male                         | 176        | 90         | 92             |     |
| Not first-generation college | 280        | 234        | 196            |     |
| First-generation college     | 126        | 46         | 36             | 405 |

406

407

408

409

410

411

412

413

414

415

416 **Table 2. Most demographic predictors did not affect performance on the evaluation of**  
 417 **genetic drift knowledge.** The general linear regression of pre- and post-recitation scores with  
 418 demographic predictors, the degrees of freedom (Df), and the summary statistics.

| Query                                                                  | Predictor                                       | Df  | Sum sq | Mean Sq | F-value | Pr(>F)             |
|------------------------------------------------------------------------|-------------------------------------------------|-----|--------|---------|---------|--------------------|
| Are pre-recitation scores dependent on demographic variables in 2016?  | First generation college                        | 1   | 0.106  | 0.106   | 4.142   | 0.043 <sup>±</sup> |
|                                                                        | Ethnicity                                       | 6   | 0.160  | 0.027   | 1.046   | 0.397              |
|                                                                        | Gender                                          | 1   | 0.026  | 0.026   | 1.004   | 0.318              |
|                                                                        | First generation college: Ethnicity             | 5   | 0.334  | 0.067   | 2.613   | 0.026 <sup>±</sup> |
|                                                                        | First generation college: Gender                | 1   | 0.006  | 0.006   | 0.242   | 0.623              |
|                                                                        | Ethnicity: Gender                               | 4   | 0.140  | 0.035   | 1.373   | 0.245              |
|                                                                        | First generation college: Ethnicity: Gender     | 3   | 0.070  | 0.023   | 0.912   | 0.436              |
|                                                                        | Residuals                                       | 181 | 4.624  | 0.026   |         |                    |
| Are post-recitation scores dependent on demographic variables in 2016? | First generation college                        | 1   | 0.232  | 0.232   | 7.955   | 0.005 <sup>±</sup> |
|                                                                        | Ethnicity                                       | 6   | 0.065  | 0.011   | 0.372   | 0.896              |
|                                                                        | Gender                                          | 1   | 0.070  | 0.070   | 2.388   | 0.124              |
|                                                                        | First generation college: Ethnicity             | 5   | 0.430  | 0.086   | 2.949   | 0.014 <sup>±</sup> |
|                                                                        | First generation college: Gender                | 1   | 0.023  | 0.023   | 0.800   | 0.372              |
|                                                                        | Ethnicity: Gender                               | 4   | 0.135  | 0.034   | 1.156   | 0.332              |
|                                                                        | First generation college: Ethnicity: Gender     | 3   | 0.054  | 0.018   | 0.616   | 0.606              |
|                                                                        | Residuals                                       | 181 | 5.281  | 0.029   |         |                    |
| Are pre-recitation scores dependent on demographic variables in 2017?  | First generation college                        | 1   | 0.014  | 0.014   | 0.466   | 0.496              |
|                                                                        | Ethnicity                                       | 7   | 0.478  | 0.068   | 2.286   | 0.029 <sup>±</sup> |
|                                                                        | Gender                                          | 1   | 0.001  | 0.001   | 0.037   | 0.848              |
|                                                                        | Genie used                                      | 1   | 0.183  | 0.183   | 6.131   | 0.014 <sup>±</sup> |
|                                                                        | First generation college: Ethnicity             | 5   | 0.084  | 0.017   | 0.563   | 0.728              |
|                                                                        | First generation college: Gender                | 1   | 0.012  | 0.012   | 0.397   | 0.529              |
|                                                                        | Ethnicity: Gender                               | 6   | 0.380  | 0.063   | 2.120   | 0.052              |
|                                                                        | First generation college: Genie used            | 1   | 0.122  | 0.122   | 4.096   | 0.044 <sup>±</sup> |
|                                                                        | Ethnicity: Genie used                           | 5   | 0.157  | 0.031   | 1.053   | 0.388              |
|                                                                        | Gender: Genie used                              | 1   | 0.284  | 0.284   | 9.495   | 0.002 <sup>±</sup> |
|                                                                        | First generation college: Ethnicity: Gender     | 3   | 0.148  | 0.049   | 1.653   | 0.178              |
|                                                                        | First generation college: Ethnicity: Genie used | 3   | 0.165  | 0.055   | 1.846   | 0.140              |
|                                                                        | Ethnicity: Gender: Genie used                   | 3   | 0.104  | 0.035   | 1.155   | 0.328              |
|                                                                        | Residuals                                       | 217 | 6.484  | 0.030   |         |                    |
| Are post-recitation scores dependent on demographic variables in 2017? | First generation college                        | 1   | 0.006  | 0.006   | 0.26    | 0.610              |
|                                                                        | Ethnicity                                       | 7   | 0.141  | 0.020   | 0.895   | 0.511              |
|                                                                        | Gender                                          | 1   | 0.0002 | 0.0002  | 0.010   | 0.921              |
|                                                                        | Genie used                                      | 1   | 0.053  | 0.053   | 2.350   | 0.127              |
|                                                                        | First generation college: Ethnicity             | 5   | 0.046  | 0.009   | 0.409   | 0.842              |
|                                                                        | First generation college: Gender                | 1   | 0.011  | 0.011   | 0.485   | 0.487              |
|                                                                        | Ethnicity: Gender                               | 6   | 0.182  | 0.030   | 1.346   | 0.238              |
|                                                                        | First generation college: Genie used            | 1   | 0.017  | 0.017   | 0.757   | 0.385              |
|                                                                        | Ethnicity: Genie used                           | 5   | 0.233  | 0.047   | 2.062   | 0.071              |
|                                                                        | Gender: Genie used                              | 1   | 0.036  | 0.036   | 1.580   | 0.210              |
|                                                                        | First generation college: Ethnicity: Gender     | 3   | 0.033  | 0.011   | 0.486   | 0.692              |
|                                                                        | First generation college: Ethnicity: Genie used | 3   | 0.129  | 0.043   | 1.902   | 0.130              |
|                                                                        | Ethnicity: Gender: Genie used                   | 3   | 0.031  | 0.010   | 0.454   | 0.715              |
|                                                                        | Residuals                                       | 217 | 4.90   | 0.023   |         |                    |

419 <sup>±</sup> Significant p-values

420

421 **Table 3. Post-recitation scores were mostly influenced by pre-recitation scores, but not**  
 422 **class section.** The Beta regression tests of pre- and post-recitation scores for specific queries,  
 423 including the predictors, estimates, standard errors (SE), z-scores, and p-values.

| Query                                                                                                                            | Predictor             | Estimate | SE    | z-score | p-value                   |
|----------------------------------------------------------------------------------------------------------------------------------|-----------------------|----------|-------|---------|---------------------------|
| Are the pre-recitation scores different across classes (Genie 2016, Genie 2017, and Non-Genie 2017)?                             | Genie 2017            | 0.961    | 0.104 | 9.241   | $< 2 \times 10^{-16\pm}$  |
|                                                                                                                                  | Non-Genie 2017        | 0.521    | 0.102 | 5.081   | $3.75 \times 10^{-07\pm}$ |
| Are the post-recitation scores dependent on the pre-recitation scores and/or class (Genie 2016, Genie 2017, and Non-Genie 2017)? | Pre-recitation scores | 3.453    | 0.237 | 14.55   | $< 2 \times 10^{-16\pm}$  |
|                                                                                                                                  | Genie 2017            | 0.509    | 0.103 | 4.948   | $7.51 \times 10^{-07\pm}$ |
| Are the post-recitation scores of 2016 dependent on the pre-recitation scores and/or the class section?                          | Non-Genie 2017        | 0.281    | 0.099 | 2.847   | 0.004 $\pm$               |
|                                                                                                                                  | Pre-recitation score  | 3.198    | 0.391 | 8.17    | $3.08 \times 10^{-16\pm}$ |
|                                                                                                                                  | TA Pair1 4:30pm       | -0.384   | 0.217 | -1.764  | 0.078                     |
|                                                                                                                                  | TA Pair1 6:00pm       | -0.164   | 0.233 | -0.702  | 0.483                     |
|                                                                                                                                  | TA Pair1 7:30pm       | -0.68    | 0.285 | -2.387  | 0.017 $\pm$               |
|                                                                                                                                  | TA Pair2 3:00pm       | 0.309    | 0.226 | 1.366   | 0.172                     |
|                                                                                                                                  | TA Pair2 4:30pm       | -0.096   | 0.205 | -0.468  | 0.64                      |
|                                                                                                                                  | TA Pair2 6:00pm       | -0.336   | 0.234 | -1.433  | 0.152                     |
| Are the post-recitation scores of 2017 dependent on the pre-recitation scores and/or the class section when using Genie?         | TA Pair2 7:30pm       | 0.052    | 0.242 | 0.213   | 0.831                     |
|                                                                                                                                  | Pre-recitation score  | 3.52     | 0.452 | 7.797   | $6.64 \times 10^{-15\pm}$ |
|                                                                                                                                  | TA Pair1 7:00pm       | -0.209   | 0.21  | -0.996  | 0.319                     |
|                                                                                                                                  | TA Pair2 1:30pm       | -0.032   | 0.209 | -0.152  | 0.879                     |
| Are the post-recitation scores of 2017 dependent on the pre-recitation scores and/or the class section when not using Genie?     | TA Pair2 7:00pm       | 0.006    | 0.223 | 0.026   | 0.98                      |
|                                                                                                                                  | Pre-recitation score  | 3.583    | 0.37  | 9.695   | $< 2 \times 10^{-16\pm}$  |
|                                                                                                                                  | TA Pair1 4:30pm       | -0.023   | 0.194 | -0.116  | 0.907                     |
|                                                                                                                                  | TA Pair2 3:00pm       | 0.33     | 0.188 | 1.75    | 0.08                      |
|                                                                                                                                  | TA Pair2 4:30pm       | -0.126   | 0.19  | -0.659  | 0.509                     |

424  $\pm$  Significant p-values

425

426

427

428

429

430

431

432

433 **Table 4. Effect of Genie on learning outcomes.** The size-effect analysis of recitation scores per  
434 year.

| Query                                                                                                      | Cohen's d (Lower 95% CI, Upper 95% CI) |
|------------------------------------------------------------------------------------------------------------|----------------------------------------|
| Are the scores different before and after instruction in 2016 (Genie)?                                     | 0.608 (0.408, 0.807)                   |
| Are the scores different before and after instruction in 2017 (Genie)?                                     | 0.632 (0.410, 0.855)                   |
| Are the scores different before and after instruction in 2017 (No-Genie)?                                  | 0.658 (0.430, 0.886)                   |
| Are the pre-recitation scores different between 2017's Genie and Non-Genie classes?                        | 0.272 (0.051, 0.493)                   |
| Are the post-recitation scores different between 2017's Genie and Non-Genie classes?                       | 0.242 (0.021, 0.462)                   |
| Is the difference in pre- and post-recitation scores different between 2017's Genie and Non-Genie classes? | -0.087 (-0.307, 0.133)                 |

435

436

437

438

439

440

441

442

443

444

445

446

447

448 **Table 5. Individual participants in all classes showed higher post-recitation scores**  
449 **compared to their pre-recitation scores.** Paired Student's t-test for individual participants in  
450 pre- and post-recitation scores per class.

| Query                                                                   | t -value (p-value) <sup>±</sup>                | Mean of the difference | Lower 95% CI, Upper 95% CI |
|-------------------------------------------------------------------------|------------------------------------------------|------------------------|----------------------------|
| Are paired post- and pre-recitation scores different in Genie 2016?     | -9.747 (2.2x10 <sup>-16</sup> ) <sup>±</sup>   | -0.104                 | -0.125, -0.083             |
| Are paired post- and pre-recitation scores different in Genie 2017?     | -8.966 (6.913x10 <sup>-16</sup> ) <sup>±</sup> | -0.102                 | -0.124, -0.079             |
| Are paired post- and pre-recitation scores different in Non-Genie 2017? | -9.816 (2.2x10 <sup>-16</sup> ) <sup>±</sup>   | -0.115                 | -0.138, -0.092             |

451 <sup>±</sup> Significant p-values

452

453

454

455

456

457

458

459

460

461

462

463

464

465 **Table 6. Participants from different pre-recitation scores quantiles showed improvement in**  
 466 **their post-recitation scores.** Student's t-test for pre- to post-recitation scores depending on pre-  
 467 recitation performance quantile.

| Query                                                                                | Quantile (pre-recitation scores range) | t -value (p-value)                             | Lower 95% CI, Upper 95% CI | Mean pre-score | Mean post-score |
|--------------------------------------------------------------------------------------|----------------------------------------|------------------------------------------------|----------------------------|----------------|-----------------|
| Do different groups of participants have differences performances in Genie 2016?     | 1 <sup>st</sup> Quantile (0-0.25)      | Not enough observations                        |                            |                |                 |
|                                                                                      | 2 <sup>nd</sup> Quantile (0.26-0.5)    | -7.855 (4.294x10 <sup>-11</sup> ) <sup>±</sup> | -0.230, -0.137             | 0.448          | 0.631           |
|                                                                                      | 3 <sup>rd</sup> Quantile (0.51-0.75)   | -4.897 (2.968x10 <sup>-06</sup> ) <sup>±</sup> | -0.120, -0.051             | 0.638          | 0.724           |
|                                                                                      | 4 <sup>th</sup> Quantile (0.76-1)      | -3.630 (0.0004) <sup>±</sup>                   | -0.082, -0.024             | 0.859          | 0.913           |
| Do different groups of participants have differences performances in Genie 2017?     | 1 <sup>st</sup> Quantile (0-0.25)      | Not enough observations                        |                            |                |                 |
|                                                                                      | 2 <sup>nd</sup> Quantile (0.26-0.5)    | -5.186 (0.0014) <sup>±</sup>                   | -0.341, -0.142             | 0.448          | 0.689           |
|                                                                                      | 3 <sup>rd</sup> Quantile (0.51-0.75)   | -7.118 (1.191x10 <sup>-09</sup> ) <sup>±</sup> | -0.222, -0.125             | 0.636          | 0.810           |
|                                                                                      | 4 <sup>th</sup> Quantile (0.76-1)      | -3.835 (0.0002) <sup>±</sup>                   | -0.069, -0.022             | 0.903          | 0.948           |
| Do different groups of participants have differences performances in Non-Genie 2017? | 1 <sup>st</sup> Quantile (0-0.25)      | Not enough observations                        |                            |                |                 |
|                                                                                      | 2 <sup>nd</sup> Quantile (0.26-0.5)    | -6.128 (1.203x10 <sup>-06</sup> ) <sup>±</sup> | -0.341, -0.170             | 0.421          | 0.676           |
|                                                                                      | 3 <sup>rd</sup> Quantile (0.51-0.75)   | -7.714 (4.412x10 <sup>-11</sup> ) <sup>±</sup> | -0.214, -0.126             | 0.642          | 0.812           |
|                                                                                      | 4 <sup>th</sup> Quantile (0.76-1)      | -2.337 (0.021) <sup>±</sup>                    | -0.059, -0.005             | 0.890          | 0.922           |

468 <sup>±</sup> Significant p-values

469

470

471

472

473

474

475

476

477

478



479 **Table 7. For most individual questions, participant post-recitation performance improved**  
 480 **across classes following instruction either with or without Genie.** McNemar’s test performed  
 481 on (in)correct to (in)correct pre- and post-recitation answers per question. McNemar statistic and  
 482 p-value are provided. We show this for (a) Genie 2016, (b) Genie 2017, and (c) Non-Genie 2017.

|                 |          | Genie 2016                      |                               |                               |                             | McNemar stat. | p-value                 |                         |
|-----------------|----------|---------------------------------|-------------------------------|-------------------------------|-----------------------------|---------------|-------------------------|-------------------------|
| Evaluation      | Question | Incorrect to incorrect switches | Incorrect to correct switches | Correct to incorrect switches | Correct to correct switches |               |                         |                         |
| Key concepts    | Q1       | 8                               | 22                            | 14                            | 159                         | 1.778         | 0.182                   |                         |
|                 | Q3       | 10                              | 53                            | 7                             | 133                         | 35.267        | 2.88x10 <sup>-09±</sup> |                         |
|                 | Q15      | 9                               | 26                            | 15                            | 153                         | 2.951         | 0.086                   |                         |
|                 | Q4       | 28                              | 44                            | 13                            | 118                         | 16.86         | 4.02x10 <sup>-05±</sup> |                         |
|                 | Q10      | 21                              | 28                            | 18                            | 136                         | 2.174         | 0.14                    |                         |
|                 | Q13      | 18                              | 86                            | 9                             | 90                          | 62.411        | 2.79x10 <sup>-15±</sup> |                         |
|                 | Q16      | 58                              | 28                            | 43                            | 74                          | 3.169         | 0.075                   |                         |
| Misconceptions* | 1        | Q7                              | 10                            | 32                            | 19                          | 142           | 3.314                   | 0.069                   |
|                 | 2        | Q5                              | 38                            | 51                            | 15                          | 99            | 19.636                  | 9.37x10 <sup>-06±</sup> |
|                 |          | Q6                              | 69                            | 53                            | 19                          | 62            | 16.056                  | 6.15x10 <sup>-05±</sup> |
|                 | 3        | Q8                              | 71                            | 46                            | 22                          | 64            | 8.471                   | 0.004±                  |
|                 |          | Q2                              | 39                            | 41                            | 27                          | 96            | 2.882                   | 0.09                    |
|                 | 4        | Q9                              | 8                             | 28                            | 21                          | 146           | 1                       | 0.317                   |
|                 |          | Q12                             | 36                            | 60                            | 22                          | 85            | 17.610                  | 2.71x10 <sup>-05±</sup> |
|                 |          | Q17                             | 49                            | 58                            | 12                          | 84            | 30.229                  | 3.84x10 <sup>-08±</sup> |
|                 |          | Q20                             | 22                            | 40                            | 18                          | 123           | 8.345                   | 0.004±                  |
|                 | 5        | Q14                             | 61                            | 46                            | 32                          | 64            | 2.513                   | 0.113                   |
|                 |          | Q19                             | 28                            | 36                            | 39                          | 100           | 0.12                    | 0.729                   |
|                 |          | Q22                             | 45                            | 30                            | 30                          | 98            | 0                       | 1                       |
|                 | 6        | Q11                             | 17                            | 50                            | 17                          | 119           | 16.254                  | 5.54x10 <sup>-05±</sup> |
|                 |          | Q18                             | 12                            | 29                            | 8                           | 154           | 11.919                  | 5.56x10 <sup>-04±</sup> |
| Q21             |          | 20                              | 24                            | 28                            | 131                         | 0.308         | 0.579                   |                         |

± Significant p-values

\* Misconceptions (Price et al. 2014)

1. Genetic drift is unpredictable because it has a random component.
2. Genetic drift is natural selection/adaptation/acclimation to the environment that may result from a need to survive.
3. Genetic drift is not evolution because it does not lead to directional change that increases fitness.
4. Natural selection is always the most powerful mechanism of evolution, and it is the primary agent of evolutionary change.
5. Genetic drift is random mutation.
6. Genetic drift is gene flow or migration.

483

484

485

486 **Table 7. For most individual questions, participant post-recitation performance improved**  
 487 **across classes following instruction either with or without Genie (cont.).**

| Evaluation      | Question | Genie 2017                      |                               |                               |                             | McNemar stat. | p-value                 |                         |
|-----------------|----------|---------------------------------|-------------------------------|-------------------------------|-----------------------------|---------------|-------------------------|-------------------------|
|                 |          | Incorrect to incorrect switches | Incorrect to correct switches | Correct to incorrect switches | Correct to correct switches |               |                         |                         |
| Key concepts    | Q1       | 0                               | 6                             | 3                             | 155                         | 1             | 0.317                   |                         |
|                 | Q3       | 1                               | 13                            | 3                             | 147                         | 6.25          | 0.012 <sup>±</sup>      |                         |
|                 | Q15      | 5                               | 17                            | 8                             | 134                         | 3.24          | 0.072                   |                         |
|                 | Q4       | 7                               | 17                            | 12                            | 128                         | 0.862         | 0.353                   |                         |
|                 | Q10      | 9                               | 22                            | 6                             | 127                         | 9.143         | 0.002 <sup>±</sup>      |                         |
|                 | Q13      | 5                               | 32                            | 5                             | 122                         | 19.703        | 9.05x10 <sup>-06±</sup> |                         |
|                 | Q16      | 31                              | 29                            | 17                            | 87                          | 3.13          | 0.077                   |                         |
| Misconceptions* | 1        | Q7                              | 6                             | 23                            | 11                          | 124           | 4.235                   | 0.04 <sup>±</sup>       |
|                 | 2        | Q5                              | 7                             | 31                            | 6                           | 120           | 16.892                  | 3.96x10 <sup>-05±</sup> |
|                 |          | Q6                              | 23                            | 47                            | 5                           | 89            | 33.923                  | 5.73x10 <sup>-09±</sup> |
|                 | 3        | Q8                              | 28                            | 35                            | 8                           | 93            | 16.953                  | 3.83x10 <sup>-05±</sup> |
|                 |          | Q2                              | 28                            | 23                            | 12                          | 101           | 3.457                   | 0.063                   |
|                 | 4        | Q9                              | 7                             | 19                            | 5                           | 133           | 8.167                   | 0.004 <sup>±</sup>      |
|                 |          | Q12                             | 21                            | 31                            | 6                           | 106           | 16.892                  | 3.96x10 <sup>-05±</sup> |
|                 |          | Q17                             | 28                            | 44                            | 7                           | 85            | 26.843                  | 2.21x10 <sup>-07±</sup> |
|                 |          | Q20                             | 8                             | 23                            | 4                           | 129           | 13.37                   | 2.56x10 <sup>-04±</sup> |
|                 | 5        | Q14                             | 17                            | 30                            | 8                           | 109           | 12.737                  | 3.59x10 <sup>-04±</sup> |
|                 |          | Q19                             | 9                             | 15                            | 14                          | 126           | 0.034                   | 0.853                   |
|                 | 6        | Q22                             | 10                            | 23                            | 9                           | 122           | 6.125                   | 0.013 <sup>±</sup>      |
|                 |          | Q11                             | 4                             | 23                            | 7                           | 130           | 8.533                   | 0.003 <sup>±</sup>      |
|                 |          | Q18                             | 2                             | 14                            | 4                           | 144           | 5.556                   | 0.018 <sup>±</sup>      |
|                 | Q21      | 5                               | 13                            | 2                             | 144                         | 8.067         | 0.005 <sup>±</sup>      |                         |

<sup>±</sup> Significant p-values

\* Misconceptions (Price et al. 2014)

1. Genetic drift is unpredictable because it has a random component.
2. Genetic drift is natural selection/adaptation/acclimation to the environment that may result from a need to survive.
3. Genetic drift is not evolution because it does not lead to directional change that increases fitness.
4. Natural selection is always the most powerful mechanism of evolution, and it is the primary agent of evolutionary change.
5. Genetic drift is random mutation.
6. Genetic drift is gene flow or migration.

488

489

490

491

492

493

494 **Table 7. For most individual questions, participant post-recitation performance improved**  
 495 **across classes following instruction either with or without Genie (cont.).**

| Evaluation      | Question | Non-Genie 2017                  |                               |                               |                             | McNemar stat. | p-value                 |                         |
|-----------------|----------|---------------------------------|-------------------------------|-------------------------------|-----------------------------|---------------|-------------------------|-------------------------|
|                 |          | Incorrect to incorrect switches | Incorrect to correct switches | Correct to incorrect switches | Correct to correct switches |               |                         |                         |
| Key concepts    | Q1       | 0                               | 13                            | 5                             | 139                         | 3.556         | 0.059                   |                         |
|                 | Q3       | 4                               | 16                            | 8                             | 129                         | 2.667         | 0.102                   |                         |
|                 | Q15      | 2                               | 18                            | 5                             | 132                         | 7.348         | 0.007 <sup>±</sup>      |                         |
|                 | Q4       | 13                              | 14                            | 11                            | 119                         | 0.36          | 0.549                   |                         |
|                 | Q10      | 6                               | 18                            | 4                             | 129                         | 8.909         | 0.003 <sup>±</sup>      |                         |
|                 | Q13      | 8                               | 39                            | 3                             | 107                         | 30.857        | 2.78x10 <sup>-08±</sup> |                         |
|                 | Q16      | 27                              | 30                            | 27                            | 73                          | 0.158         | 0.691                   |                         |
| Misconceptions* | 1        | Q7                              | 11                            | 23                            | 10                          | 113           | 5.121                   | 0.024 <sup>±</sup>      |
|                 | 2        | Q5                              | 16                            | 39                            | 4                           | 98            | 28.488                  | 9.43x10 <sup>-08±</sup> |
|                 |          | Q6                              | 24                            | 60                            | 5                           | 68            | 46.538                  | 8.98x10 <sup>-12±</sup> |
|                 | 3        | Q8                              | 36                            | 44                            | 8                           | 69            | 24.923                  | 5.97x10 <sup>-07±</sup> |
|                 |          | Q2                              | 43                            | 20                            | 20                          | 74            | 0                       | 1                       |
|                 | 4        | Q9                              | 10                            | 20                            | 6                           | 121           | 7.538                   | 0.006 <sup>±</sup>      |
|                 |          | Q12                             | 32                            | 34                            | 11                          | 80            | 11.756                  | 6.07x10 <sup>-04±</sup> |
|                 |          | Q17                             | 34                            | 33                            | 4                           | 86            | 22.730                  | 1.86x10 <sup>-06±</sup> |
|                 |          | Q20                             | 9                             | 15                            | 4                           | 129           | 6.368                   | 0.012 <sup>±</sup>      |
|                 | 5        | Q14                             | 21                            | 32                            | 12                          | 92            | 9.091                   | 0.003 <sup>±</sup>      |
|                 |          | Q19                             | 16                            | 26                            | 11                          | 104           | 6.081                   | 0.014 <sup>±</sup>      |
|                 |          | Q22                             | 16                            | 23                            | 6                           | 112           | 9.966                   | 0.002 <sup>±</sup>      |
|                 | 6        | Q11                             | 6                             | 32                            | 5                           | 114           | 19.703                  | 9.05x10 <sup>-06±</sup> |
|                 |          | Q18                             | 1                             | 16                            | 6                           | 134           | 4.545                   | 0.033 <sup>±</sup>      |
| Q21             |          | 10                              | 18                            | 12                            | 117                         | 1.200         | 0.273                   |                         |

<sup>±</sup> Significant p-values

\* Misconceptions (Price et al. 2014)

1. Genetic drift is unpredictable because it has a random component.
2. Genetic drift is natural selection/adaptation/acclimation to the environment that may result from a need to survive.
3. Genetic drift is not evolution because it does not lead to directional change that increases fitness.
4. Natural selection is always the most powerful mechanism of evolution, and it is the primary agent of evolutionary change.
5. Genetic drift is random mutation.
6. Genetic drift is gene flow or migration.

496

497

498

499

500

501

502 **Table 8. Comparison of performance between Genie 2017 and Non-Genie 2017, controlling**  
 503 **by question.** Fisher’s exact test testing the association between switches from ‘Incorrect to  
 504 Correct’ and ‘Correct to Incorrect’ answers per question and by method of instruction (Genie  
 505 2017 and Non-Genie 2017).

| Evaluation      | Question | Genie 2017                    |                             | Non-Genie 2017                |                             | OR.est | p-value |       |
|-----------------|----------|-------------------------------|-----------------------------|-------------------------------|-----------------------------|--------|---------|-------|
|                 |          | Incorrect to correct switches | Correct to correct switches | Incorrect to correct switches | Correct to correct switches |        |         |       |
| Key concepts    | Q1       | 6                             | 3                           | 13                            | 5                           | 0.777  | 1.000   |       |
|                 | Q3       | 13                            | 3                           | 16                            | 8                           | 2.126  | 0.473   |       |
|                 | Q15      | 17                            | 8                           | 18                            | 5                           | 0.597  | 0.523   |       |
|                 | Q4       | 17                            | 12                          | 14                            | 11                          | 1.111  | 1.000   |       |
|                 | Q10      | 22                            | 6                           | 18                            | 4                           | 0.818  | 1.000   |       |
|                 | Q13      | 32                            | 5                           | 39                            | 3                           | 0.497  | 0.463   |       |
|                 | Q16      | 29                            | 17                          | 30                            | 27                          | 1.529  | 0.321   |       |
| Misconceptions* | 1 Q7     | 23                            | 11                          | 23                            | 10                          | 0.910  | 1.000   |       |
|                 | 2 Q5     | 31                            | 6                           | 39                            | 4                           | 0.534  | 0.501   |       |
|                 |          | Q6                            | 47                          | 5                             | 60                          | 5      | 0.785   | 0.749 |
|                 | 3 Q8     | 35                            | 8                           | 44                            | 8                           | 0.797  | 0.785   |       |
|                 |          | Q2                            | 23                          | 12                            | 20                          | 20     | 1.900   | 0.242 |
|                 | 4 Q9     | 19                            | 5                           | 20                            | 6                           | 1.137  | 1.000   |       |
|                 |          | Q12                           | 31                          | 6                             | 34                          | 11     | 1.661   | 0.421 |
|                 |          | Q17                           | 44                          | 7                             | 33                          | 4      | 0.764   | 0.755 |
|                 |          | Q20                           | 23                          | 4                             | 15                          | 4      | 1.519   | 0.700 |
|                 | 5 Q14    | 30                            | 8                           | 32                            | 12                          | 1.400  | 0.610   |       |
|                 |          | Q19                           | 15                          | 14                            | 26                          | 11     | 0.459   | 0.136 |
|                 |          | Q22                           | 23                          | 9                             | 23                          | 6      | 0.671   | 0.562 |
|                 | 6 Q11    | 23                            | 7                           | 32                            | 5                           | 0.519  | 0.349   |       |
|                 |          | Q18                           | 14                          | 4                             | 16                          | 6      | 1.304   | 1.000 |
| Q21             |          | 13                            | 2                           | 18                            | 12                          | 4.207  | 0.094   |       |

± Significant p-values

\* Misconceptions (Price et al. 2014)

1. Genetic drift is unpredictable because it has a random component.
2. Genetic drift is natural selection/adaptation/acclimation to the environment that may result from a need to survive.
3. Genetic drift is not evolution because it does not lead to directional change that increases fitness.
4. Natural selection is always the most powerful mechanism of evolution, and it is the primary agent of evolutionary change.
5. Genetic drift is random mutation.
6. Genetic drift is gene flow or migration.

506

507

508

509 **Figures**

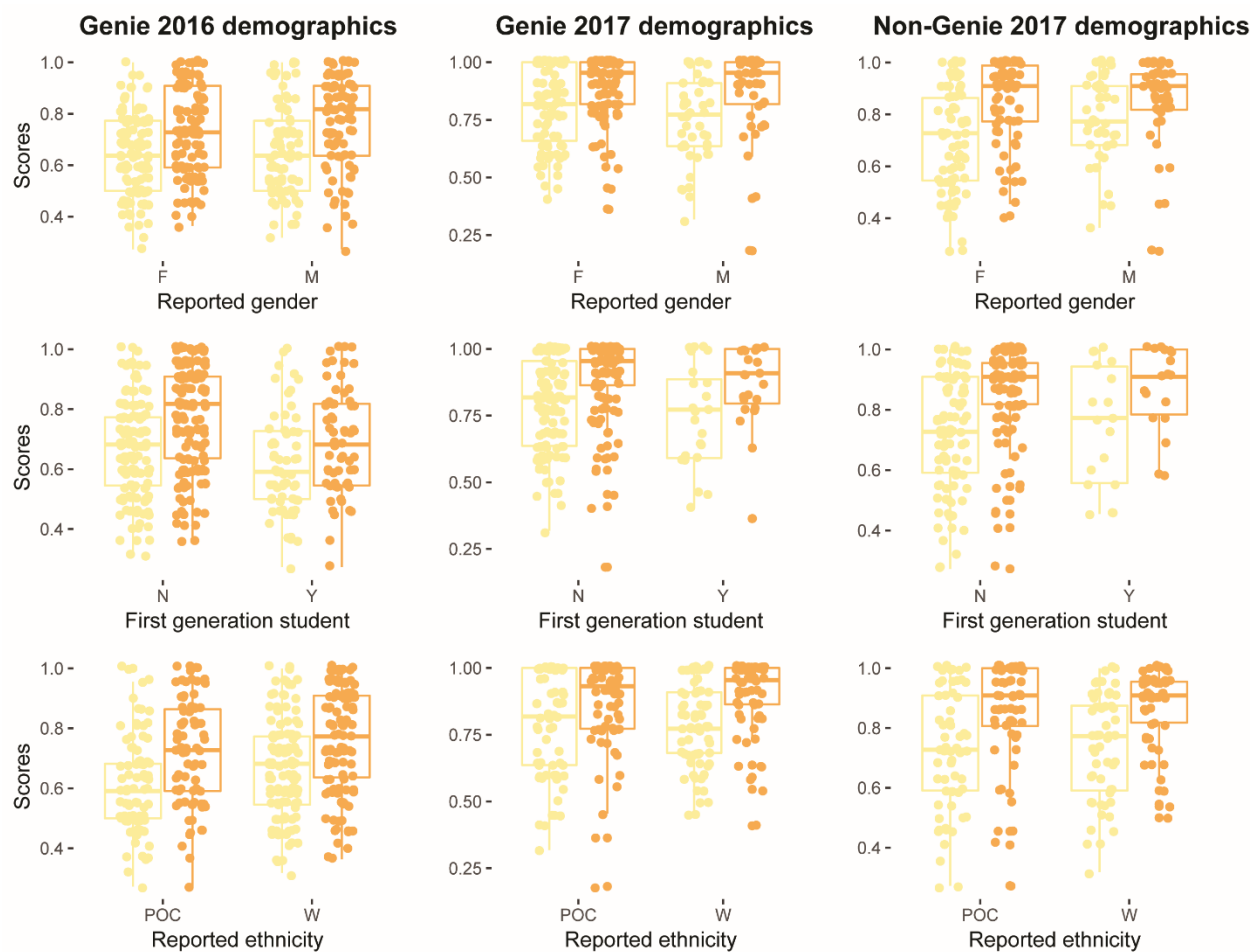

510

511 **Figure 1. Pre- and post-recitation performance was comparable in participants from**  
512 **different demographic groups.** Pre-recitation (pale yellow) and post-recitation (dark yellow)  
513 scores are plotted. Three demographic variables are plotted: ‘Reported gender’, ‘First-  
514 generation’ college, and ‘Reported ethnicity’.

515

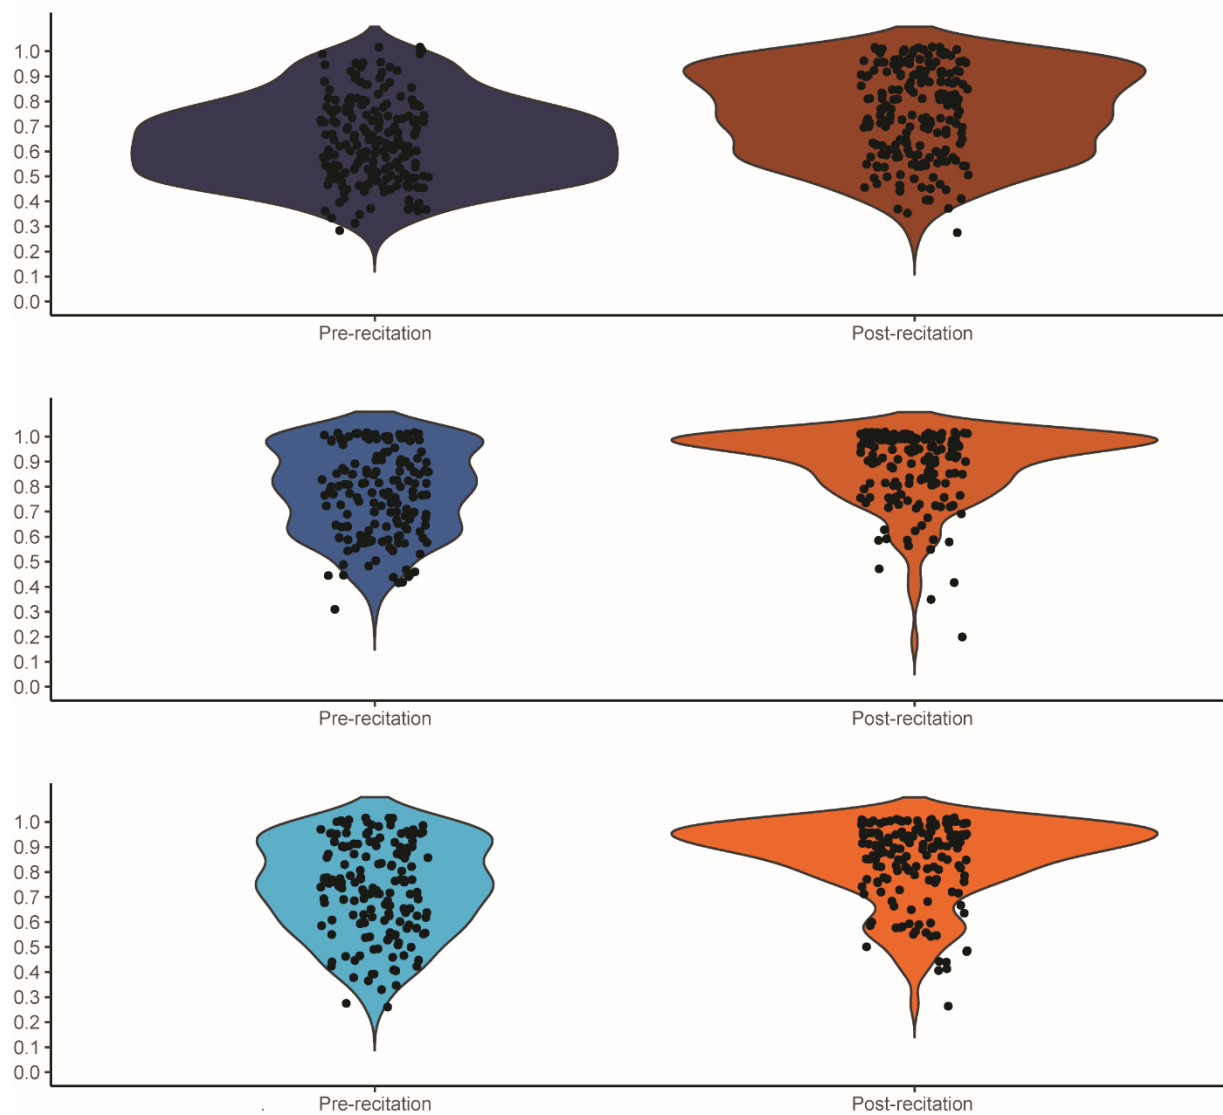

516

517 **Figure 2. Post-recitation performance improved regardless of the instruction method. Pre-**

518 recitation (blue) and post-recitation (orange) scores are plotted for each class.

519

520

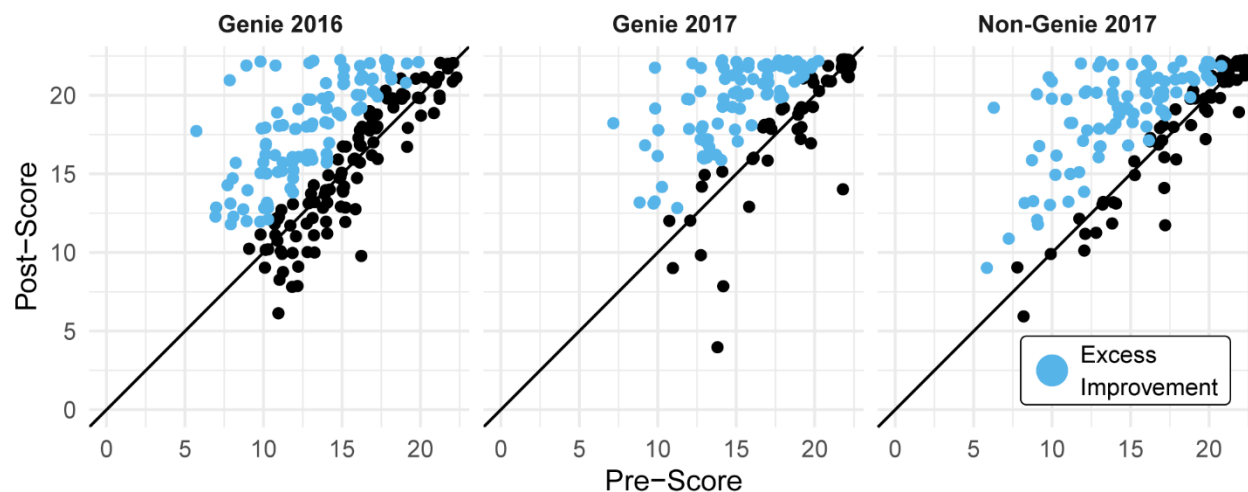

521

522 **Figure 3. Students' test scores generally improved after instruction.** Blue dots represent  
523 excess improvement in class performance. The presence of blue points in a graph indicates that  
524 there were more students whose post-test score was better than their pre-test score. The number  
525 of blue points indicates how many more students improved their scores than students whose  
526 scores decreased.

527

528

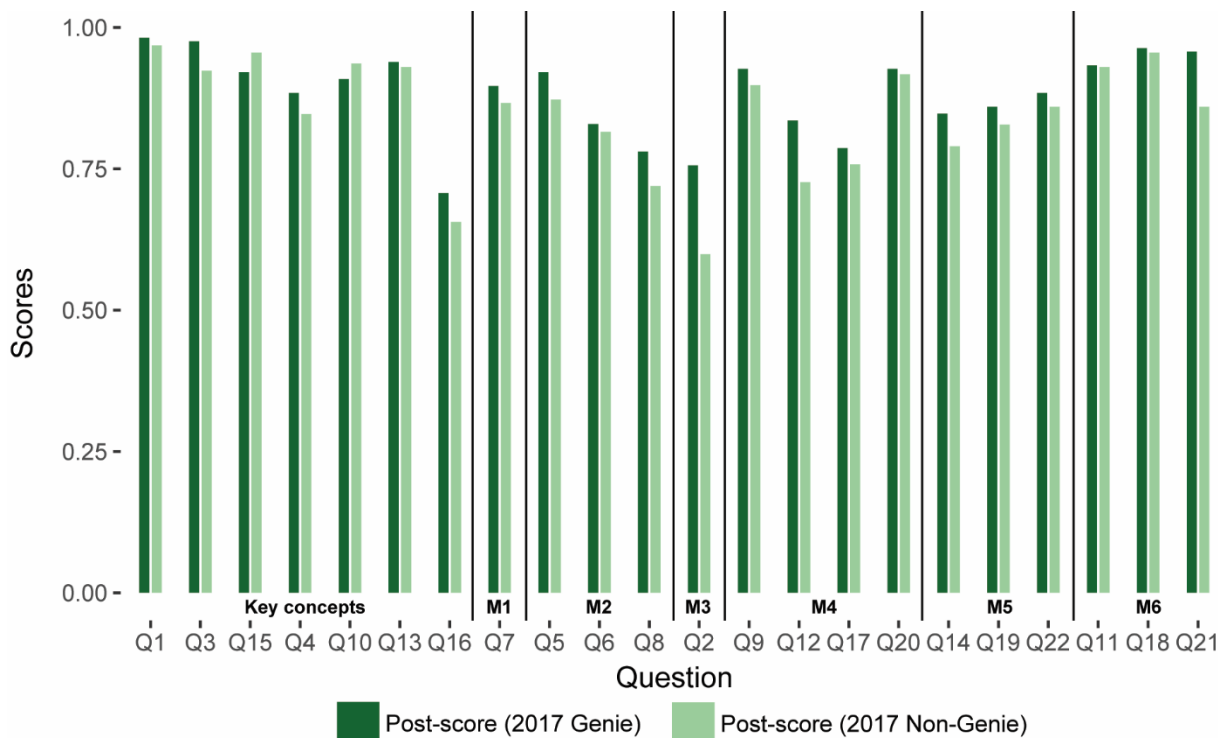

529

\* Misconceptions (Price et al. 2014)

1. Genetic drift is unpredictable because it has a random component.
2. Genetic drift is natural selection/adaptation/acclimation to the environment that may result from a need to survive.
3. Genetic drift is not evolution because it does not lead to directional change that increases fitness.
4. Natural selection is always the most powerful mechanism of evolution, and it is the primary agent of evolutionary change.
5. Genetic drift is random mutation.
6. Genetic drift is gene flow or migration.

530

531 **Figure 4. Post-recitation scores by question (Price et al. 2014) were generally higher in**

532 **Genie 2017 compared to Non-Genie 2017.** A bar plot comparing Genie 2017 (dark green) and

533 Non-Genie 2017 (pale green) is shown. Questions have been grouped according to the

534 classification provided by Price et al. (2014), with questions pertaining to Key concepts and

535 misconceptions (M1-M6) separated by horizontal bars.

536



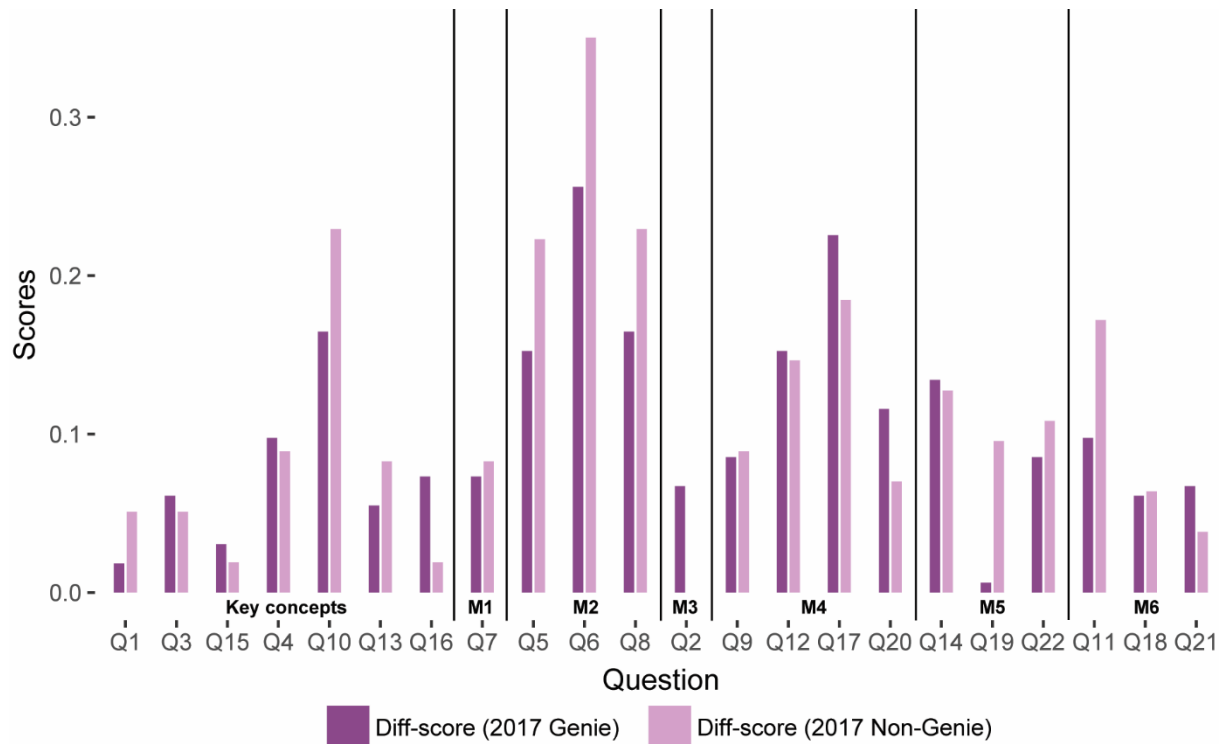

537

\* Misconceptions (Price et al. 2014)

1. Genetic drift is unpredictable because it has a random component.
2. Genetic drift is natural selection/adaptation/acclimation to the environment that may result from a need to survive.
3. Genetic drift is not evolution because it does not lead to directional change that increases fitness.
4. Natural selection is always the most powerful mechanism of evolution, and it is the primary agent of evolutionary change.
5. Genetic drift is random mutation.
6. Genetic drift is gene flow or migration.

538

539 **Figure 5. The difference between pre- and post-recitation scores by question (Price et al.**  
 540 **2014) shows that some questions saw higher improvement in Non-Genie 2017 while other**  
 541 **showed higher improvement in Genie 2017. A bar plot comparing Genie 2017 (dark purple)**  
 542 **and Non-Genie 2017 (pale purple) is shown. Questions have been grouped according to the**  
 543 **classification provided by Price et al. (2014), with questions pertaining to Key concepts and**  
 544 **misconceptions (M1-M6) separated by horizontal bars.**

545

546

547 **Ethics approval and consent to participate**

548 The study was approved by IRB protocol: STUDY00003707.

549 **Consent for publication**

550 Not applicable.

551 **Availability of data and materials**

552 A previous version of this manuscript is available as preprint (<https://doi.org/10.1101/268672>).

553 All data and code used has been made available as supplementary materials. Genie is publicly  
554 available at <https://cartwrig.ht/apps/genie/>

555 **Competing interests**

556 The authors declare to competing interests.

557 **Funding**

558 This study was supported by the National Science Foundation award DBI-1356548 to RAC and  
559 the National Institute of General Medical Sciences of the National Institutes of Health under  
560 Award Number R35GM124827 to MAW. The content is solely the responsibility of the authors  
561 and does not necessarily represent the official views of the National Institutes of Health.

562 **Authors' contributions**

563 AIC wrote and edited the manuscript, performed the statistical analyses, and participated in in-  
564 class instruction. BHR designed and wrote Genie. MSR revised the manuscript, designed the  
565 class study, and participated in in-class instruction. RAC designed and wrote Genie, edited the

566 manuscript, and the performed statistical analyses. MAW edited the manuscript, designed the  
567 class study, and participated in in-class instruction prior to recitations using Genie.

### 568 **Acknowledgements**

569 The authors would like to thank the students of Spring 2016 and Spring 2016, BIO345 course at  
570 ASU for their participation on this study.

571 **References**

- 572 Abi Abdallah DS, Fonner CW, Lax NC, Babeji MR, Palé FA. Evaluating the Use of Avida-ED  
573 Digital Organisms to Teach Evolution & Natural Selection. *Am. Biol. Teach.* 2020;82(2):114–9.
- 574 Alsharif NZ, Qi Y. A three-year study of the impact of instructor attitude, enthusiasm, and  
575 teaching style on student learning in a medicinal chemistry course. *Am. J. Pharm. Educ.*  
576 2014;78(7).
- 577 Alters BJ, Nelson CE. Perspective: Teaching evolution in higher education. *Evolution* (N. Y).  
578 2002;56(10):1891–901.
- 579 Andrews TM, Price RM, Mead LS, McElhinny TL, Thanukos A, Perez KE, et al. Biology  
580 undergraduates' misconceptions about genetic drift. *CBE Life Sci. Educ.* 2012;11(3):258–9.
- 581 Beggrow EP, Nehm RH. Students' Mental Models of Evolutionary Causation: Natural Selection  
582 and Genetic Drift. *Evol. Educ. Outreach.* 2012;5(3):429–44.
- 583 Cribari-Neto F, Zeileis A. Journal of Statistical SoftwareBeta Regression in R. *J. Stat. Softw.*  
584 2010;34(2):1–24.
- 585 Delignette-Muller ML, Dutang C. fitdistrplus: An R package for fitting distributions. *J. Stat.*  
586 *Softw.* 2015;64(4):1–34.
- 587 Dolan EL, Collins JP. We must teach more effectively: Here are four ways to get started. *Mol.*  
588 *Biol. Cell.* 2015;26(12):2151–5.
- 589 George M. Slavich, Zimbardo PG. Transformational Teaching: Theoretical Underpinnings, Basic  
590 Principles, and Core Methods. *Educ Psychol Rev.* 2012;24(4):569–608.
- 591 Grineski S, Daniels H, Collins T, Morales DX, Frederick A, Garcia M. The conundrum of social  
592 class: Disparities in publishing among STEM students in undergraduate research programs at a  
593 Hispanic majority institution. *Sci Educ.* 2018;102(2):283–303.
- 594 Jury M, Smeding A, Darnon C. First-generation students underperformance at university: the  
595 impact of the function of selection. *Front. Psychol.* 2015;6(May):1–11.
- 596 Kalinowski ST, Leonard MJ, Andrews TM, Litt AR. Six classroom exercises to teach natural  
597 selection to undergraduate biology students. *CBE Life Sci. Educ.* 2013;12(3):483–93.
- 598 Kliman BR, Cedar PD, College C, Education N. The EvolGenius Population Genetics Computer  
599 Simulation : How it Works. *Nat. Educ.* 2008;1(3):1–9.
- 600 Kliman RM. A Project-Based Approach to Teaching Complex Population Genetics to  
601 Undergraduates . *Teach. Popul. Genet.* 2001;27(4):13–20.
- 602 Labar T, Adami C. Evolution of drift robustness in small populations. *Nat. Commun.* [Internet].  
603 Springer US; 2017;8(1):1–12. Available from: <http://dx.doi.org/10.1038/s41467-017-01003-7>
- 604 Lark A, Richmond G, Mead LS, Smith JJ, Pennock RT. Exploring the Relationship between  
605 Experiences with Digital Evolution and Students' Scientific Understanding and Acceptance of  
606 Evolution. *Am. Biol. Teach.* 2018;80(2):74–86.
- 607 Lee TW, Grogan KE, Liepkalns JS. Making evolution stick: Using sticky notes to teach the

- 608 mechanisms of evolutionary change. *Evol. Educ. Outreach* [Internet]. Springer US; 2017;10(1).  
609 Available from: <https://doi.org/10.1186/s12052-017-0074-2>
- 610 Maleki F, Talaei MH, Moghadam SRM, Shadigo S, Taghinejad H, Mirzaei A. Investigating the  
611 influence of teachers' characteristics on the teacher-student relations from students' perspective  
612 at ilam university of medical sciences. *J. Clin. Diagnostic Res.* 2017;11(6):JC04–8.
- 613 Nei M, Chakraborty R, Fuerst PA. Infinite allele model with varying mutation rate. *Genetics.*  
614 1976;73(11):4164–8.
- 615 Nelson CE. Teaching evolution (and all of biology) more effectively: Strategies for engagement,  
616 critical reasoning, and confronting misconceptions. *Integr. Comp. Biol.* 2008;48(2):213–25.
- 617 Nelson CW, Sanford JC. The effects of low-impact mutations in digital organisms. *Theor. Biol.*  
618 *Med. Model.* [Internet]. BioMed Central Ltd; 2011;8(1):9. Available from:  
619 <http://www.tbiomed.com/content/8/1/9>
- 620 Perez KE, Hiatt A, Davis GK, Trujillo C, French DP, Terry M, et al. The evodevoci: A concept  
621 inventory for gauging students' understanding of evolutionary developmental biology. *CBE Life*  
622 *Sci. Educ.* 2013;12(4):665–75.
- 623 Price RM, Andrews TC, McElhinny TL, Mead LS, Abraham JK, Thanukos A, et al. The genetic  
624 drift inventory: A tool for measuring what advanced undergraduates have mastered about genetic  
625 drift. *CBE Life Sci. Educ.* 2014;13(1):65–75.
- 626 Price RM, Pope DS, Abraham JK, Maruca S, Meir E. Observing populations and testing  
627 predictions about genetic drift in a computer simulation improves college students' conceptual  
628 understanding. *Evol. Educ. Outreach.* Springer US; 2016;9(1).
- 629 Revell LJ. learnPopGen: An R package for population genetic simulation and numerical analysis.  
630 *Ecol. Evol.* 2019;9(14):7896–902.
- 631 Shir N, Bidabadi A, Isfahani AN, Rouhollahi A, Khalili R, Bidabadi NS. Effective teaching  
632 method in higher education Effective teaching methods in higher education: requirements and  
633 barriers. *J Adv Med Educ Prof.* Oct. 2016;4(4):170–8.
- 634 Shulman LS. Knowledge and Teaching: Foundations of the new reform. *Harv. Educ. Rev.*  
635 1987;57(1):1–21.
- 636 Smith JJ, Johnson WR, Lark AM, Mead LS, Wisner MJ, Pennock RT. An Avida-ED digital  
637 evolution curriculum for undergraduate biology. *Evol. Educ. Outreach.* Springer US; 2016;9(1).
- 638 Staub NL. Teaching Evolutionary Mechanisms: Genetic Drift and M&M's®. *Bioscience.*  
639 2002;52(4):373.
- 640 Tanner K, Allen D. Approaches to biology teaching and learning: Learning styles and the  
641 problem of instructional selection - Engaging all students in science courses. *Cell Biol. Educ.*  
642 2004;3(4):197–201.
- 643 Tanner K, Allen D. Approaches to biology teaching and learning: Understanding the wrong  
644 answers-teaching toward conceptual change. *Cell Biol. Educ.* 2005;4(SUMMER):112–7.
- 645 Tibbetts Y, Priniski SJ, Hecht CA, Borman GD, Harackiewicz JM. Different institutions and

- 646 different values: Exploring first-generation student fit at 2-year colleges. *Front. Psychol.*  
647 2018;9(APR):1–19.
- 648 Wieman CE. Large-scale comparison of science teaching methods sends clear message. *Proc.*  
649 *Natl. Acad. Sci. U. S. A.* 2014;111(23):8319–20.
- 650 Ziadie MA, Andrews TC. Moving evolution education forward: A systematic analysis of  
651 literature to identify gaps in collective knowledge for teaching. *CBE Life Sci. Educ.* 2018;17(1).  
652
